# Supplementary material for: Homoepitaxial growth of high-quality GaN nanoarrays for enhanced UV luminescence
Source: Royal Society of Chemistry journal article supplement (doi:10.1039/d1ce01519b), 2022-01-01
Supplement: d1ce01519b1.pdf [file d1ce01519b1.pdf]

## Supporting Information

### **Homoepitaxial growth of high-quality GaN nanoarrays for enhanced UV luminescence**

Baodan Liu,<sup>a,b\*</sup> Qingyun Liu,<sup>c</sup> Wenjin Yang,<sup>c</sup> Jing Li,<sup>a,b</sup> Christophe Labbé,<sup>d</sup> Xavier Portier,<sup>d</sup> Xinglai Zhang,<sup>c</sup> Jinlei Yao<sup>e,\*</sup>

<sup>a</sup>School of Materials Science and Engineering, Northeastern University, Shenyang 110819, China

<sup>b</sup>Foshan Graduate School of Northeastern University, No. 2, Zihui Road, Shunde District, Foshan, 528300, China

<sup>c</sup>Shenyang National Laboratory for Materials Science (SYNL), Institute of Metal Research (IMR), Chinese Academy of Sciences (CAS), No. 72, Wenhua Road, Shenhe District, Shenyang, 110016, China

<sup>d</sup>CIMAP CNRS/CEA/ENSICAEN/Normandie University, 6 Bd Maréchal Juin, 14050 Caen Cedex 4, France

<sup>e</sup>Jiangsu Key Laboratory of Micro and Nano Heat Fluid Flow Technology and Energy Application, School of Physical Science and Technology, Suzhou University of Science and Technology, Suzhou 215009, China;

Contact: [liubaodan@mail.neu.edu.cn](mailto:liubaodan@mail.neu.edu.cn); [jlyao@usts.edu.cn](mailto:jlyao@usts.edu.cn)

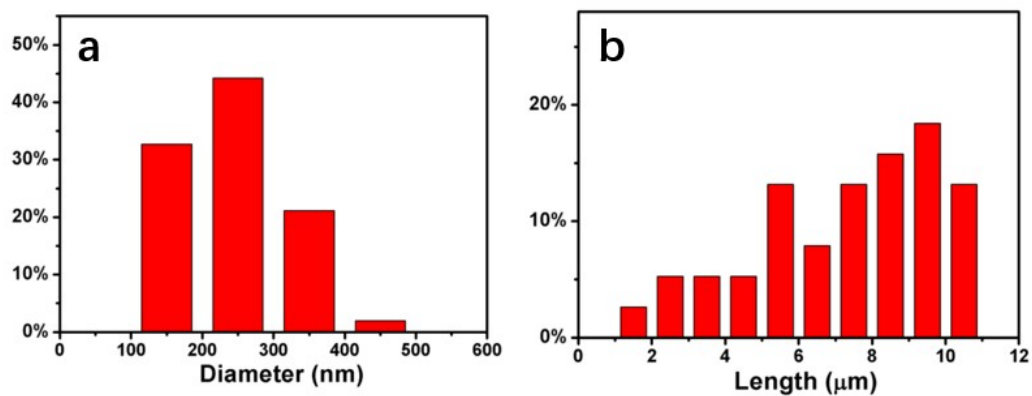

**Figure S1** (a) Diameter and (b) height statistic distribution maps of GaN nanowire array

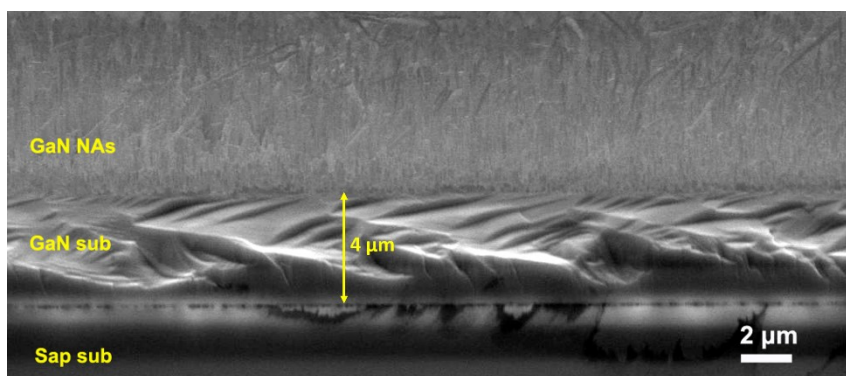

**Figure S2** Cross-sectional SEM image of GaN nanoarrays grown on GaN substrate with a thickness of 4  $\mu\text{m}$ .

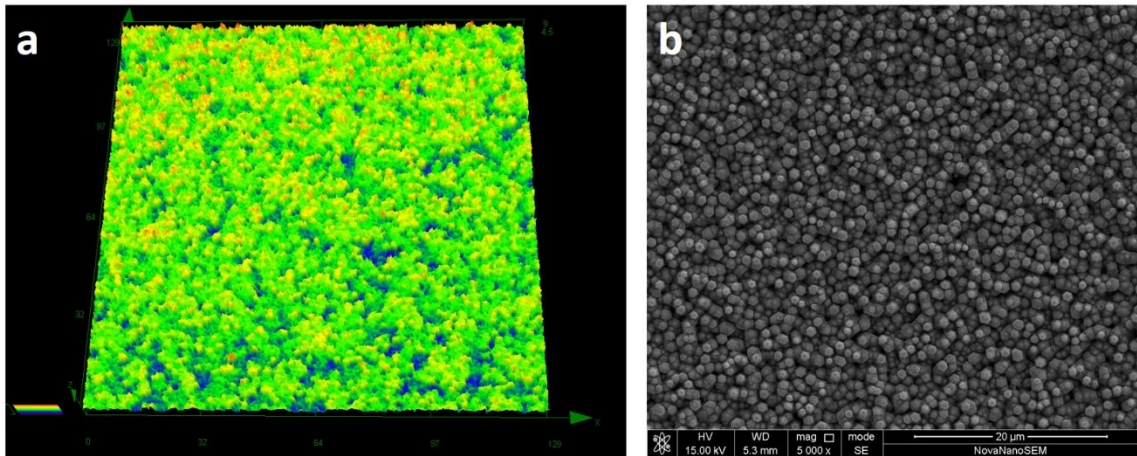

**Figure S3** (a) Confocal microscope image and (b) low-magnification SEM image of GaN nanoarrays without Au catalyst

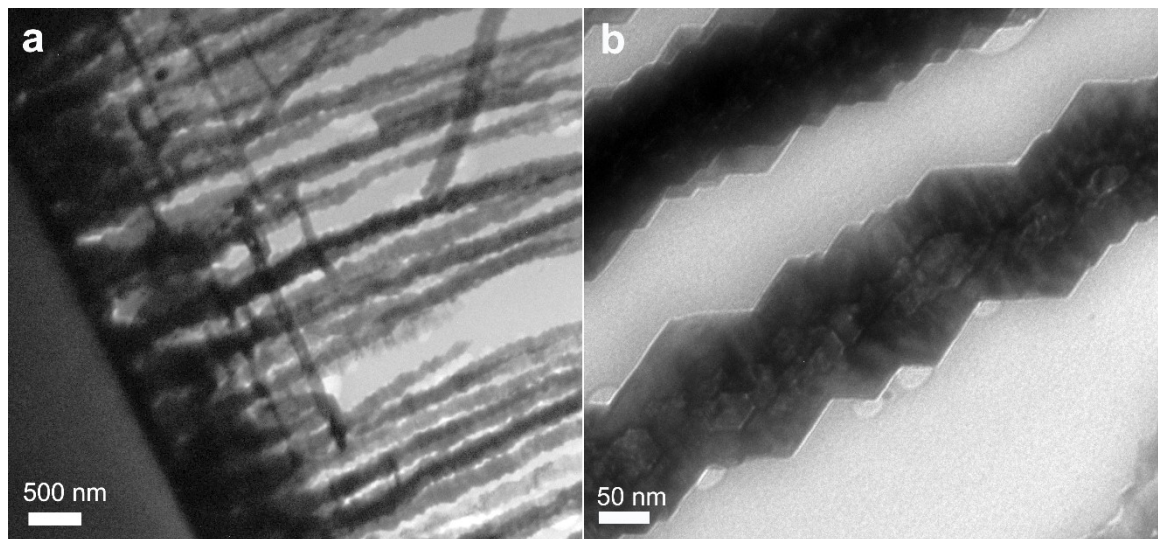

**Figure S4** (a) Low-magnification and (b) high-magnification TEM images of GaN nanoarrays;

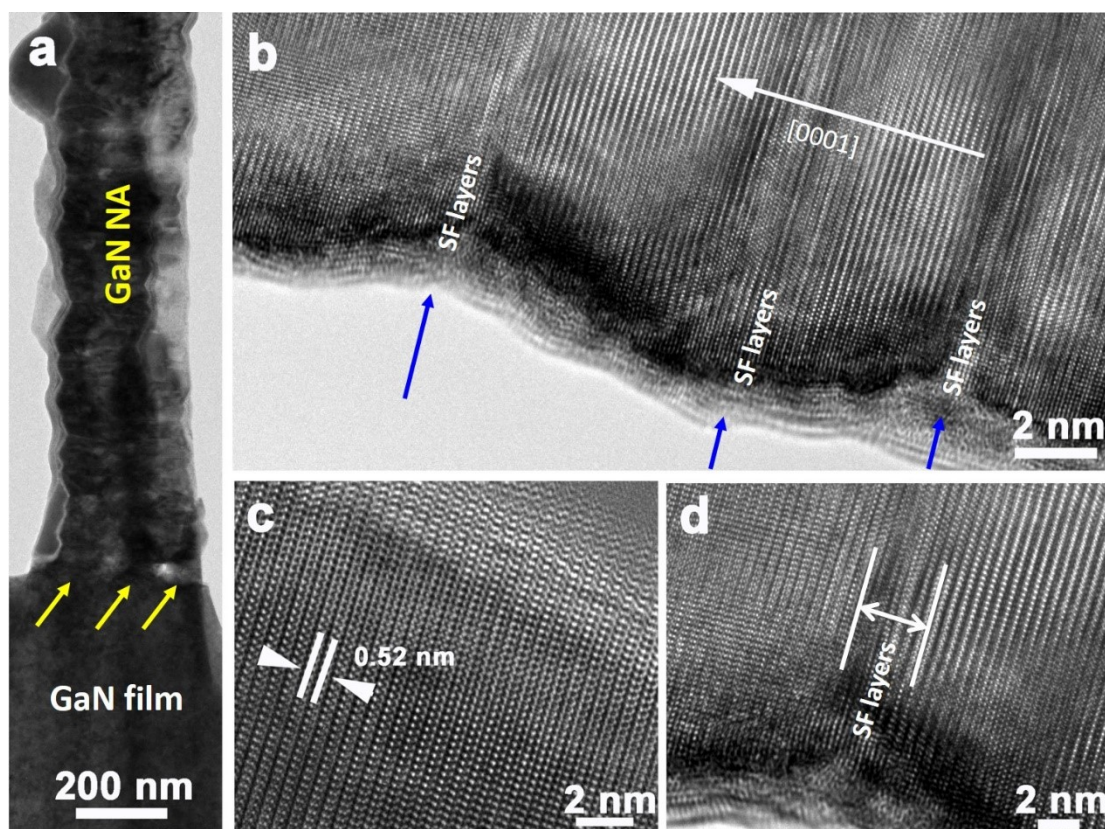

**Figure S5** (a) typical TEM image of an individual GaN nanowire with corrugated surface and homoepitaxially grown on GaN film; (b-d) atomically scaled high-resolution TEM images of GaN nanowires at different regions;
